# Supplementary material
Source: PubMed Central journal article supplement (PMC3632665)
Supplement: NIHMS432406-supplement-1_si_001.pdf [file NIHMS432406-supplement-1_si_001.pdf]

# Peptide/Protein Separation with Cationic Polymer Brush Nanosponges for MALDI-MS Analysis

Bojan Mitrovic, Stephanie Eastwood, VenNey Wong, Daniel Dyer, Gary Kinsel and Colleen Scott\*

Department of Chemistry & Biochemistry, Southern Illinois University, Carbondale, IL 62901-4409, USA

E-MAIL: [cscott@chem.siu.edu](mailto:cscott@chem.siu.edu)

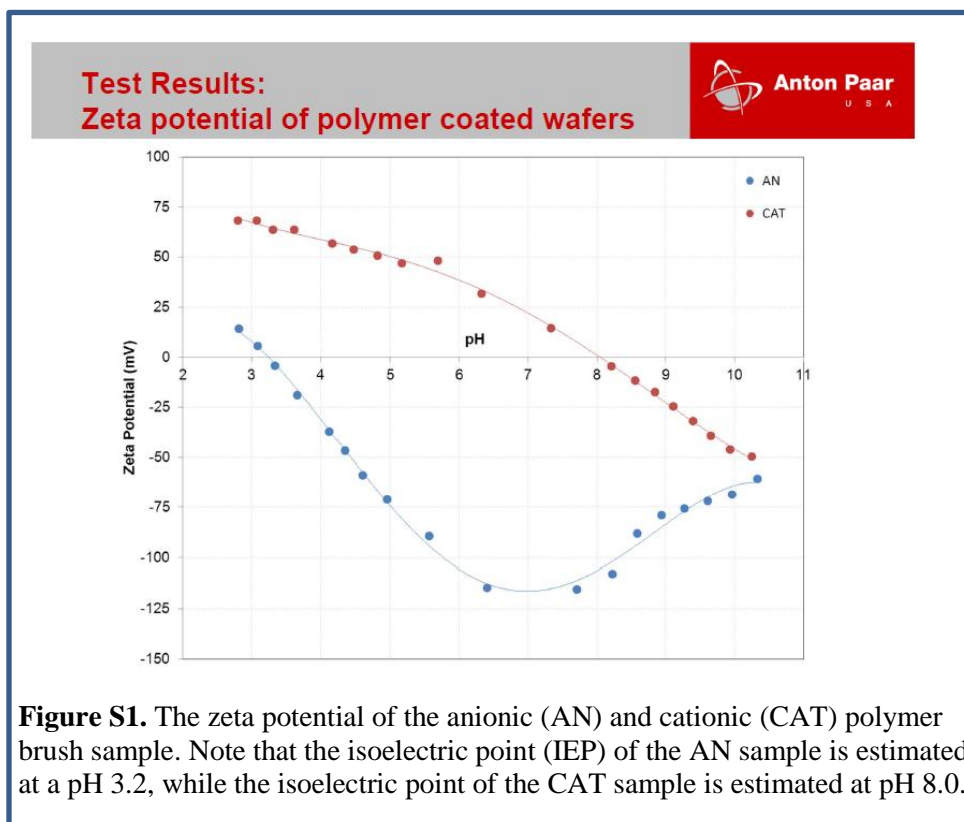

**Procedure:<sup>1</sup>**

The samples were affixed to the sample holder and held in place using a spacer. The samples were rinsed with 300 mL of distilled water followed by 300 mL of a 1.00 mM KCl solution. A pH ramp was performed from the pH of 1.00 mM KCl (~ pH 5.5) to a pH 3.0 using a 0.100 M HCl solution. The samples were again rinsed with 300 mL of distilled water and 300 mL of a 1.00 mM KCl solution. The electrolyte solution was replaced with a fresh batch of 1.00 mM KCl solution, and a pH ramp was performed to pH 10.0 using a 0.100 M NaOH solution. The zeta potential was calculated using the Helmholtz-Smoluchowski equation.

Helmholtz-Smoluchowski equation

$$\zeta = \frac{dl}{dp} \times \frac{\eta}{\varepsilon \times \varepsilon_0} \times \frac{L}{A}$$

***I* ...streaming current**

***p* ... pressure difference**

***η* ... viscosity**

***ε* ... dielectric constant**

***ε 0* ... vacuum permittivity**

***L* ... length**

***A* ... cross-section**

***K* ... Bulk conductivity**

---

<sup>1</sup> This measurement was performed by Anton Paar (USA)
